# Supplementary material for: Generation of controlled monodisperse porous polymer particles by dipped inkjet injection
Source: Royal Society of Chemistry journal article supplement (doi:10.1039/c4ra13275k), 2014-12-09
Supplement: c4ra13275k1.pdf [file c4ra13275k1.pdf]

## Supporting Information

### Generation of controlled monodisperse porous polymer particles by dipped inkjet injection

Jianmin Yang, Daisuke Katagiri, Sifeng Mao, Hulie Zeng,\* Hizuru Nakajima and Katsumi Uchiyama\*

Department of Applied Chemistry, Graduate School of Urban Environmental Sciences, Tokyo Metropolitan University, Minamiohsawa, Hachioji, Tokyo 192-0397, Japan. Fax: +81-42-6772821; Tel: +81-42-6772835.

E-mail: zeng-hulie@tmu.ac.jp; uchiyama-katsumi@tmu.ac.jp.

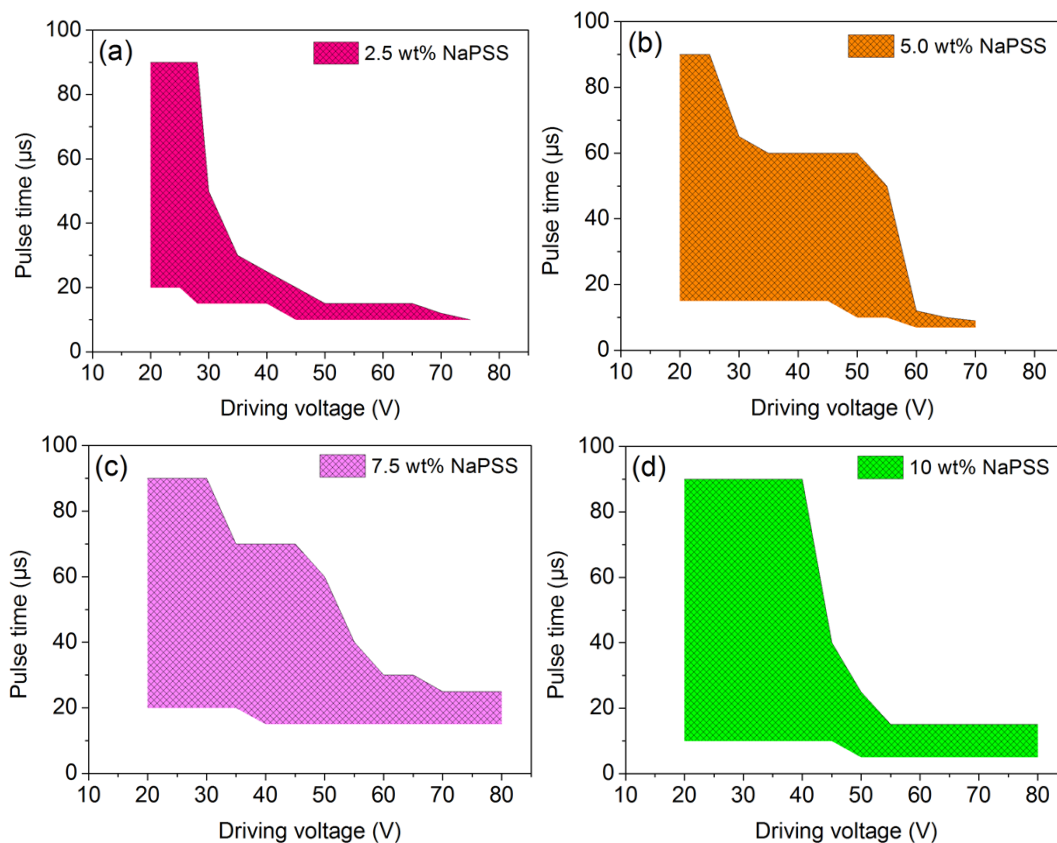

**Figure S1.** Scope of droplet formation by inkjet injection for generating monodisperse polymer droplets in 1-butanol. The concentration of NaPSS was (a) 2.5 wt%, (b) 5 wt%, (c) 7.5 wt%, and (d) 10 wt% (10 mM SDS). Colored regions show the possible scopes for monodisperse droplet generation. The sizes of droplet were ranging from 80 μm to 260 μm.

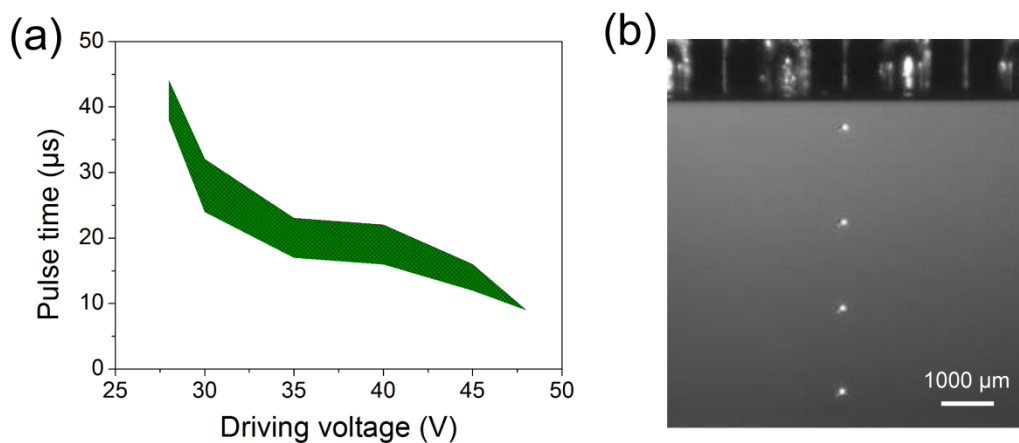

**Figure S2.** (a) Scope of droplet formation by inkjet injection for generating monodisperse polymer droplets in air. Colored regions show the possible scopes for monodisperse droplet generation. The sizes of droplet were ranging from 160 μm to 205 μm. (b) Serial photo of aqueous polymer solution droplet ejected in air, driving waveform; 40 V—17 μs, droplet size  $\approx$  175 μm. The concentration of NaPSS 15 wt% (10 mM SDS).

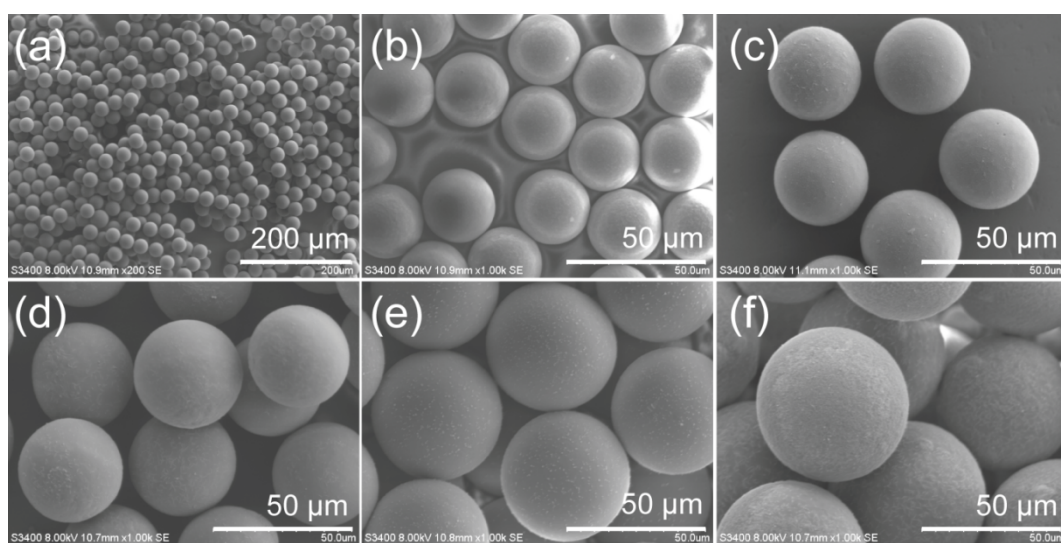

**Figure S3.** SEM images of polymer particles with mean diameters of (a,b) 26  $\mu\text{m}$ , (c) 35  $\mu\text{m}$ , (d) 38  $\mu\text{m}$ , (e) 48  $\mu\text{m}$ , and (f) 55  $\mu\text{m}$ . The concentration of NaPSS was 15 wt% (10 mM SDS).

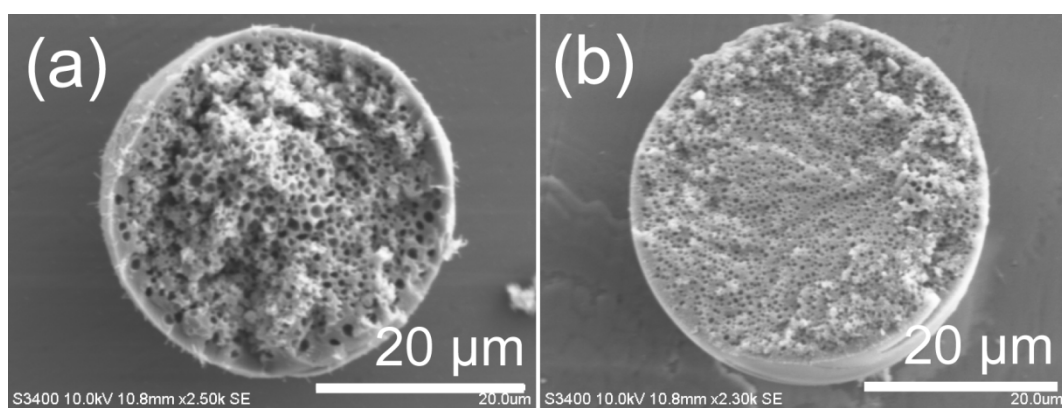

**Figure S4.** SEM images of the interior structure of a polymer particle prepared using a concentration of NaPSS of (a) 7.5 wt% and (b) 10 wt%.

**Table S1.** Density, viscosity and surface tension of each polymer solutions and 1-butanol.<sup>1</sup>

| Solution      | Density (g/mL) | Viscosity (mPa s) | Surface tension (mN/m) |
|---------------|----------------|-------------------|------------------------|
| 2.5 wt% NaPSS | 1.009          | 1.690             | 36.77                  |
| 5.0 wt% NaPSS | 1.021          | 2.369             | 35.26                  |
| 7.5 wt% NaPSS | 1.033          | 3.221             | 34.05                  |
| 10 wt% NaPSS  | 1.045          | 4.485             | 33.79                  |
| 15 wt% NaPSS  | 1.071          | 6.822             | 33.59                  |
| 1-Butanol     | 0.8098         | 2.581             | 27.97                  |

<sup>1</sup> All polymer solutions were containing 10 mM SDS, and the measurement temperature control at 25 °C.

**Table S2.** Resulting particle diameters under injection setting conditions and corresponding droplet sizes.

| Injection condition   | Droplet size                    |        | Particle diameter               |        |
|-----------------------|---------------------------------|--------|---------------------------------|--------|
|                       | Mean $\pm$ SD ( $\mu\text{m}$ ) | CV (%) | Mean $\pm$ SD ( $\mu\text{m}$ ) | CV (%) |
| 20 V—20 $\mu\text{s}$ | 87.4 $\pm$ 4.96                 | 5.67   | 21.3 $\pm$ 0.59                 | 2.78   |
| 30 V—20 $\mu\text{s}$ | 96.8 $\pm$ 3.69                 | 3.81   | 24.5 $\pm$ 1.19                 | 4.85   |
| 30 V—30 $\mu\text{s}$ | 123.4 $\pm$ 4.03                | 3.27   | 29.2 $\pm$ 1.19                 | 4.07   |
| 40 V—30 $\mu\text{s}$ | 141.8 $\pm$ 4.92                | 3.47   | 34.9 $\pm$ 1.28                 | 3.65   |
| 40 V—40 $\mu\text{s}$ | 170.8 $\pm$ 3.87                | 2.26   | 41.8 $\pm$ 1.42                 | 3.39   |
| 40 V—50 $\mu\text{s}$ | 187.6 $\pm$ 5.69                | 3.03   | 45.2 $\pm$ 1.88                 | 4.16   |
| 50 V—40 $\mu\text{s}$ | 206.4 $\pm$ 6.24                | 3.02   | 49.8 $\pm$ 2.31                 | 4.62   |
